# Supplementary material for: Basal Ganglia Dopamine Availability and Immune Activation Interact and Relate to Anhedonia Severity among Youth with Depression
Source: bioRxiv preprint, doi:10.64898/2025.12.23.696320, version 1 (2025-12-24)
Supplement: Supplemental Material [file 696320_file02.docx]

**Supplementary Information**

Basal Ganglia Dopamine Availability and Immune Activation

Interact and Relate to Anhedonia Severity among Youth with Depression

Iris Ka-Yi Chat1,2, James W. Murrough3,4,5, Scott Russo4,6, Finnegan Calabro2, Beatriz Luna2, Kalyan Tripathy2, Tina Gupta7, Zachary Brodnick2,8, Megan M. Julien2, Neil P. Jones2, Neal D. Ryan2, Helmet T. Karim2, Rebecca B. Price2, Jihui Diaz9, & Erika E. Forbes2*

1Department of Psychology, University of California, Los Angeles, Los Angeles, CA, USA

2Department of Psychiatry, University of Pittsburgh Medical Center, Pittsburgh, PA, USA

3Depression and Anxiety Center for Discovery and Treatment, Department of Psychiatry, Icahn School of Medicine of Mount Sinai, New York, NY, USA

4Nash Family Department of Neuroscience, Icahn School of Medicine at Mount Sinai, New York, NY, USA

5VISN 2 Mental Illness Research, Education, and Clinical Center (MIRECC), James J. Peters VA Medical Center, Bronx NY, USA

6Brain-Body Research Insititute, Icahn School of Medicine at Mount Sinai, New York, NY, USA

7Department of Psychology, University of Oregon, Eugene, OR, USA

8Department of Neuroscience, The Ohio State University, Columbus, OH, USA

9School of Nursing, Duke University, Durham, NC, USA

*Corresponding author. Address: University of Pittsburgh Department of Psychiatry, 3811 O'Hara Street, Pittsburgh, PA 15213, email: [forbese@upmc.edu](mailto:forbese@upmc.edu).

**Supplemental Results**

**Secondary Analyses**

***Interaction between Dopamine Availability in Subregions of Basal Ganglia and General Immune Activation (Principal Component 1)***

As noted in the main text, secondary analyses were conducted to examine basal ganglia subregions for any interaction effects observed at the whole-basal ganglia level. Interaction effects between dopamine availability in the caudate, putamen, and pallidum and immune principal component 1 (PC1) scores were observed on overall anhedonia as measured by the SHAPS. For participants in the top 68.97%, 70.69%, and 74.14% of immune PC1 scores, respectively, lower dopamine availability in the caudate (*B*=-.341, *SE*=.159, *p*=.037, *ΔR2*=.071), putamen (*B*=-.242, *SE*=.090, *p*=.010, *ΔR2*=.109), and pallidum (*B*=-.129, *SE*=.061, *p*=.041, *ΔR2*=.070) were associated with greater SHAPS overall anhedonia. We did not detect an interaction effect with the nucleus accumbens (NAc; *B*=.079, *SE*=.087, *p*=.371, *ΔR2*=.016).

We also detected an interaction effect between dopamine availability in the putamen and pallidum and immune PC1 scores on anticipatory anhedonia. Specifically, for participants in the top 58.62% and 67.24% of immune PC1 scores, respectively, lower dopamine availability in the putamen (*B*=.187, *SE*=.076, *p*=.017, *ΔR2*=.079) and pallidum (*B*=.128, *SE*=.051, *p*=.016, *ΔR2*=.083) were associated with greater PVSS anticipatory anhedonia. Such interaction effects were not observed with other subregions (caudate: *B*=.155, *SE*=.136, *p*=.262, *ΔR2*=.018; NAc: *B*=.042, *SE*=.075, *p*=.583, *ΔR2*=.005).

**Exploratory Analysese**

***Other Immune Principal Components (PC2–PC5)***

Lower PC2 scores were associated with greater PVSS overall anhedonia (*B*=.169, *SE*=.068, *p*=.016, *ΔR2*=.092). The interaction effect between dopamine availability in the basal ganglia and PC2 on PVSS overall anhedonia was not significant, *B*=-.004, *SE*=.033, *p*=.911, *ΔR2*=.001. There were no main effect for PC2 score (*B*=-.408, *SE*=.316, *p*=.203, *ΔR2*= .027) or interaction effect between basal ganglia dopamine availability and PC2 on SHAPS overall anhedonia (*B*=-.102, *SE*=.155, *p*=.513, *ΔR2*=.007). The main effect of PC2 score on higher PVSS anticipatory anhedonia was not significant, *B*= .413, *SE*=.261, *p*=.121, *ΔR2*=.034. The interaction effect between basal ganglia dopamine availability and PC2 on PVSS anticipatory anhedonia also was not significant, *B*=.128, *SE*=.128, *p*=.320, *ΔR2*=.014). Lower PC2 scores were associated with higher PVSS consummatory anhedonia, *B*=.739, *SE*=.303, *p*=.019, *ΔR2*=.098. The interaction effect between basal ganglia dopamine availability and PC2 on consummatory anhedonia were not significant, *B*=-.047, *SE*=.149, *p*=.756, *ΔR2*=.002).

For immune PC3 and PC4 scores, there were no main effects or interaction effects for dopamine availability in basal ganglia and immune PC scores on overall scores of anhedonia, anticipatory anhedonia, or consummatory anhedonia (*p’s* > .05).

There were no main effects of PC5 score on overall anhedonia, anticipatory anhedonia, or consummatory anhedonia (*p’s* > .05). An interaction effect between basal ganglia dopamine availability and immune PC5 scores was detected for SHAPS overall anhedonia, *B*=.564, *SE*=.275, *p*=.046, *ΔR2*=.064, such that for participants in the bottom 32.76% of PC5 score, lower dopamine availability in the basal ganglia was associated with greater SHAPS overall anhedonia. Follow-up analyses probing the effect within subregions of basal ganglia observed an effect with putamen, *B*=.488, *SE*=.232, *p*=.041, *ΔR2*=.067, such that for participants in the bottom 27.59% of immune PC5 scores, lower dopamine availability in the putamen was associated with higher SHAPS overall anhedonia. Such interaction effects were not observed within other subregions (caudate: *B*=.527, *SE*=.375, *p*=.167, *ΔR2*=.031; pallidum: *B*=.246, *SE*=.162, *p*=.135, *ΔR2*=.037; NAc: *B*=-.043, *SE*=.202, *p*=.832, *ΔR2*=.001). We did not detect interaction effects between dopamine availability in the basal ganglia and immune PC5 scores on PVSS overall anhedonia, anticipitary anhedonia, and consummatory anhedonia (*p’s* > .05).

Supplementary Table 1. Summary of NPX values for each of the 70 immune protein included in PCA.

| **Immune Proteins** | **Mean NPX units, log2 scale** | **Standard Deviation** |
| --- | --- | --- |
| IL8 | 5.91 | 0.54 |
| VEGFA | 10.82 | 0.42 |
| CD8A | 6.69 | 1.29 |
| CDCP1 | 2.46 | 0.44 |
| CD244 | 6.59 | 0.36 |
| IL7 | 1.34 | 0.56 |
| OPG | 10.12 | 0.33 |
| LAP TGF-beta-1 | 6.53 | 0.40 |
| uPA | 10.30 | 0.39 |
| IL6 | 2.71 | 0.89 |
| IL-17C | 1.96 | 0.87 |
| MCP-1 | 10.50 | 0.34 |
| CXCL11 | 8.45 | 0.86 |
| AXIN1 | 2.93 | 1.24 |
| TRAIL | 7.41 | 0.37 |
| CXCL9 | 6.70 | 0.73 |
| CST5 | 6.87 | 0.53 |
| OSM | 4.11 | 1.03 |
| CXCL1 | 10.33 | 0.76 |
| CCL4 | 6.01 | 0.54 |
| CD6 | 5.79 | 0.58 |
| SCF | 9.22 | 0.38 |
| IL18 | 8.88 | 0.56 |
| SLAMF1 | 2.36 | 0.38 |
| TGF-alpha | 1.49 | 0.51 |
| MCP-4 | 14.68 | 0.70 |
| CCL11 | 6.50 | 0.68 |
| TNFSF14 | 3.86 | 0.71 |
| FGF-23 | 1.93 | 0.69 |
| MMP-1 | 11.54 | 1.13 |
| LIF-R | 4.30 | 0.29 |
| FGF-21 | 3.40 | 1.49 |
| CCL19 | 11.27 | 1.04 |
| IL-10RB | 6.23 | 0.30 |
| IL-18R1 | 8.48 | 0.41 |
| PD-L1 | 6.57 | 0.32 |
| CXCL5 | 11.97 | 1.20 |
| TRANCE | 5.53 | 0.65 |
| HGF | 8.84 | 0.51 |
| IL-12B | 6.56 | 0.61 |
| MMP-10 | 9.10 | 0.70 |
| IL10 | 3.72 | 0.63 |
| TNF | 3.25 | 0.58 |
| CCL23 | 11.81 | 0.39 |
| CD5 | 5.29 | 0.32 |
| CCL3 | 5.49 | 0.64 |
| Flt3L | 8.85 | 0.46 |
| CXCL6 | 8.59 | 0.70 |
| CXCL10 | 7.99 | 0.71 |
| 4E-BP1 | 4.30 | 2.35 |
| SIRT2 | 4.90 | 1.42 |
| CCL28 | 2.65 | 0.83 |
| DNER | 8.68 | 0.24 |
| EN-RAGE | 2.80 | 1.05 |
| CD40 | 11.35 | 0.42 |
| IFN-gamma | 5.76 | 0.78 |
| FGF-19 | 7.59 | 0.89 |
| MCP-2 | 8.84 | 0.65 |
| CASP-8 | 4.00 | 0.86 |
| CCL25 | 5.66 | 0.58 |
| CX3CL1 | 4.05 | 0.70 |
| TNFRSF9 | 5.35 | 0.42 |
| NT-3 | 1.94 | 0.42 |
| TWEAK | 9.33 | 0.37 |
| CCL20 | 6.39 | 0.93 |
| ST1A1 | 7.01 | 1.07 |
| STAMBP | 6.02 | 0.89 |
| ADA | 5.60 | 0.38 |
| TNFB | 3.98 | 0.96 |
| CSF-1 | 10.29 | 0.21 |

**Note.** See Supplementary List of Abbreviations for full protein names.

| Supplementary Table 2. Loadings of immune proteins in the first five principal components. | | | | | | | | | |
| --- | --- | --- | --- | --- | --- | --- | --- | --- | --- |
| PC1 | | PC2 | | PC3 | | PC4 | | PC5 | |
| Immune Protein | Loading | Immune Protein | Loading | Immune Protein | Loading | Immune Protein | Loading | Immune Protein | Loading |
| LAP TGF-beta-1 | 0.193 | 4E-BP1 | 0.270 | ST1A1 | -0.235 | TRAIL | 0.247 | CD8A | -0.267 |
| TNFSF14 | 0.189 | TNFB | -0.263 | TWEAK | 0.228 | uPA | 0.241 | DNER | 0.263 |
| CD40 | 0.184 | AXIN1 | 0.254 | SIRT2 | -0.208 | CD8A | 0.220 | IL6 | -0.235 |
| VEGFA | 0.177 | SIRT2 | 0.238 | EN-RAGE | 0.203 | ST1A1 | -0.208 | CX3CL1 | 0.233 |
| IL18 | 0.173 | CX3CL1 | -0.230 | AXIN1 | -0.201 | TNF | 0.203 | OSM | -0.232 |
| IL7 | 0.169 | STAMBP | 0.227 | TGF-alpha | 0.198 | IL7 | -0.195 | TNFB | 0.216 |
| CCL4 | 0.168 | CASP-8 | 0.213 | STAMBP | -0.192 | TNFB | -0.185 | CCL23 | -0.209 |
| MCP-1 | 0.167 | CXCL1 | 0.194 | CCL11 | 0.178 | CXCL5 | -0.184 | ADA | 0.201 |
| PD-L1 | 0.164 | CXCL10 | -0.182 | CCL28 | 0.178 | 4E-BP1 | 0.181 | FGF-19 | 0.196 |
| IL8 | 0.163 | IL-12B | -0.160 | LIF-R | 0.173 | CCL11 | 0.181 | CCL20 | 0.165 |
| CXCL6 | 0.163 | CXCL5 | 0.159 | IL10 | -0.172 | CD5 | 0.172 | TWEAK | 0.162 |
| CCL3 | 0.159 | LIF-R | -0.149 | SCF | 0.164 | SCF | 0.159 | CD244 | 0.159 |
| CASP-8 | 0.158 | IL-10RB | -0.146 | IL-12B | -0.161 | CXCL11 | -0.154 | 4E-BP1 | -0.152 |
| MCP-4 | 0.156 | CCL23 | -0.144 | MCP-1 | 0.160 | IL6 | -0.153 | HGF | -0.152 |
| HGF | 0.155 | NT-3 | 0.142 | CCL25 | 0.159 | CD6 | 0.151 | CXCL11 | 0.147 |
| CSF-1 | 0.154 | CSF-1 | -0.141 | DNER | 0.158 | IL-17C | 0.148 | SCF | 0.145 |
| MMP-1 | 0.152 | CXCL9 | -0.139 | MMP-1 | 0.153 | TNFSF14 | -0.141 | OPG | -0.144 |
| TGF-alpha | 0.151 | HGF | -0.128 | CXCL10 | -0.151 | STAMBP | -0.140 | CST5 | 0.143 |
| CD244 | 0.149 | CCL11 | 0.126 | CD244 | -0.149 | TNFRSF9 | 0.134 | CD6 | 0.139 |
| CDCP1 | 0.144 | CD6 | -0.125 | FGF-23 | -0.149 | IL8 | -0.133 | CSF-1 | -0.139 |
| MCP-2 | 0.142 | CXCL6 | 0.125 | HGF | 0.147 | CXCL1 | -0.132 | CXCL10 | 0.136 |
| SLAMF1 | 0.137 | CD5 | -0.125 | IL7 | 0.145 | FGF-19 | 0.132 | IL-10RB | -0.136 |
| TNF | 0.137 | IL-17C | 0.125 | CXCL9 | -0.139 | MCP-4 | -0.131 | CXCL5 | 0.134 |
| CCL28 | 0.136 | MMP-10 | -0.120 | IFN-gamma | -0.138 | CCL19 | 0.128 | VEGFA | -0.124 |
| CXCL11 | 0.134 | CCL3 | -0.119 | TNFRSF9 | -0.127 | OSM | -0.127 | LIF-R | 0.122 |
| CD5 | 0.132 | IFN-gamma | -0.118 | CDCP1 | -0.121 | NT-3 | 0.126 | ST1A1 | 0.120 |
| CXCL5 | 0.131 | TRAIL | 0.110 | CD5 | -0.116 | VEGFA | -0.125 | CXCL6 | 0.114 |
| TNFRSF9 | 0.130 | CD8A | 0.108 | MCP-4 | 0.112 | CXCL6 | -0.123 | TGF-alpha | -0.109 |
| CD6 | 0.125 | TNFRSF9 | -0.107 | uPA | 0.109 | IL10 | 0.121 | TNFSF14 | -0.108 |
| OSM | 0.125 | IL6 | -0.107 | MCP-2 | 0.109 | LIF-R | 0.120 | CXCL9 | 0.101 |
| CCL11 | 0.123 | IL-18R1 | -0.107 | IL8 | 0.105 | CX3CL1 | -0.115 | MCP-4 | 0.098 |
| ADA | 0.121 | ST1A1 | 0.106 | CX3CL1 | 0.104 | MMP-1 | -0.115 | CCL28 | 0.097 |
| STAMBP | 0.117 | TGF-alpha | -0.105 | CXCL11 | -0.104 | IFN-gamma | 0.111 | TRANCE | -0.094 |
| IL-10RB | 0.117 | CDCP1 | -0.100 | LAP TGF-beta-1 | 0.100 | CST5 | 0.109 | CCL4 | 0.093 |
| IL10 | 0.114 | FGF-23 | 0.098 | TNF | -0.099 | DNER | 0.108 | SLAMF1 | 0.093 |
| IL-18R1 | 0.112 | PD-L1 | -0.094 | CCL3 | -0.099 | SIRT2 | -0.107 | EN-RAGE | -0.091 |
| TRAIL | 0.109 | OSM | -0.085 | CCL20 | -0.098 | HGF | -0.104 | NT-3 | 0.091 |
| CXCL1 | 0.107 | uPA | 0.084 | IL6 | -0.097 | SLAMF1 | 0.098 | Flt3L | 0.086 |
| SIRT2 | 0.106 | CCL20 | -0.084 | IL18 | -0.096 | CD40 | -0.096 | IL-12B | -0.084 |
| IL-17C | 0.104 | OPG | -0.073 | OSM | 0.092 | TWEAK | 0.091 | CCL25 | 0.082 |
| AXIN1 | 0.103 | FGF-21 | 0.070 | CD40 | -0.089 | Flt3L | 0.089 | CXCL1 | 0.082 |
| IL6 | 0.101 | CCL25 | 0.069 | TNFB | -0.089 | CCL28 | -0.083 | TNFRSF9 | -0.074 |
| TWEAK | 0.100 | TWEAK | -0.069 | VEGFA | 0.088 | AXIN1 | -0.073 | MCP-2 | 0.070 |
| IFN-gamma | 0.099 | LAP TGF-beta-1 | 0.069 | CASP-8 | -0.086 | FGF-23 | 0.072 | TNF | -0.069 |
| CD8A | 0.099 | CD244 | -0.068 | CXCL5 | 0.085 | MCP-1 | 0.072 | uPA | -0.060 |
| uPA | 0.098 | CXCL11 | 0.066 | CSF-1 | -0.082 | IL-18R1 | -0.069 | IL-18R1 | -0.055 |
| CXCL9 | 0.098 | CCL4 | -0.066 | SLAMF1 | -0.076 | CCL3 | 0.066 | CASP-8 | -0.055 |
| EN-RAGE | 0.097 | EN-RAGE | -0.064 | CD8A | 0.073 | CD244 | 0.066 | FGF-21 | -0.051 |
| CCL25 | 0.094 | IL18 | -0.059 | TNFSF14 | 0.069 | OPG | -0.065 | LAP TGF-beta-1 | -0.050 |
| IL-12B | 0.092 | ADA | 0.058 | PD-L1 | -0.064 | CCL23 | 0.065 | MMP-10 | 0.048 |
| 4E-BP1 | 0.092 | CD40 | 0.057 | FGF-21 | -0.063 | CXCL9 | 0.064 | IL-17C | -0.046 |
| CXCL10 | 0.084 | SCF | 0.055 | CD6 | -0.055 | CDCP1 | 0.059 | IFN-gamma | 0.034 |
| LIF-R | 0.066 | MCP-4 | 0.052 | CCL19 | -0.053 | EN-RAGE | -0.058 | IL10 | 0.033 |
| FGF-21 | 0.062 | VEGFA | -0.049 | CST5 | 0.052 | CCL25 | 0.053 | IL8 | 0.033 |
| FGF-23 | 0.062 | MMP-1 | 0.048 | NT-3 | 0.050 | CASP-8 | -0.053 | STAMBP | 0.032 |
| OPG | 0.059 | CCL28 | 0.039 | CCL23 | -0.050 | MCP-2 | -0.050 | CD40 | -0.031 |
| CST5 | 0.055 | IL8 | -0.038 | FGF-19 | -0.043 | IL-12B | 0.045 | PD-L1 | 0.030 |
| NT-3 | 0.054 | IL7 | 0.038 | IL-10RB | -0.041 | FGF-21 | 0.044 | CDCP1 | 0.030 |
| CCL20 | 0.054 | DNER | 0.036 | TRAIL | 0.028 | CCL20 | -0.037 | CCL19 | 0.028 |
| CCL23 | 0.050 | SLAMF1 | -0.033 | Flt3L | -0.024 | TGF-alpha | -0.037 | CCL3 | -0.026 |
| Flt3L | 0.049 | CCL19 | -0.033 | ADA | -0.022 | CXCL10 | 0.035 | TRAIL | -0.020 |
| FGF-19 | 0.045 | TNFSF14 | -0.032 | 4E-BP1 | -0.020 | IL18 | 0.034 | FGF-23 | 0.017 |
| TRANCE | 0.039 | MCP-1 | -0.031 | IL-18R1 | -0.019 | CSF-1 | -0.030 | CCL11 | 0.016 |
| ST1A1 | 0.037 | IL10 | -0.027 | CCL4 | 0.016 | IL-10RB | -0.025 | CD5 | -0.011 |
| DNER | 0.036 | CST5 | 0.024 | CXCL6 | 0.011 | TRANCE | -0.019 | SIRT2 | 0.009 |
| CCL19 | 0.034 | TRANCE | -0.020 | OPG | -0.011 | CCL4 | 0.011 | IL18 | 0.009 |
| CX3CL1 | -0.031 | MCP-2 | -0.018 | TRANCE | -0.009 | PD-L1 | 0.011 | IL7 | 0.008 |
| MMP-10 | 0.024 | TNF | 0.016 | IL-17C | 0.007 | LAP TGF-beta-1 | 0.010 | MCP-1 | 0.003 |
| TNFB | -0.016 | FGF-19 | 0.006 | CXCL1 | -0.006 | ADA | 0.006 | AXIN1 | 0.001 |
| SCF | -0.003 | Flt3L | 0.001 | MMP-10 | 0.003 | MMP-10 | -0.005 | MMP-1 | -0.001 |

**Note.** Proteins are listed in descending order of their absolute loading values for the corresponding principal component (i.e., highest loading first). See Supplementary List of Abbreviations for full protein names.

**List of Abbreviations**

Abbreviations for immune proteins included in Supplementary Tables 1–2 are listed below (in alphabetical order).

4E-BP1, eukaryotic translation initiation factor 4E–binding protein 1;
ADA, adenosine deaminase;
AXIN1, axis inhibition protein 1;
CASP-8, caspase-8;
CCL, C-C motif chemokine ligand;
CD, cluster of differentiation;
CD5, cluster of differentiation 5;
CD6, cluster of differentiation 6;
CD8A, cluster of differentiation 8 alpha chain;
CD40, cluster of differentiation 40;
CD244, cluster of differentiation 244;
CDCP1, CUB domain–containing protein 1;
CSF-1, colony-stimulating factor 1;
CST5, cystatin D;
CX3CL1, C-X3-C motif chemokine ligand 1 (fractalkine);
CXCL, C-X-C motif chemokine ligand;
DNER, delta/notch-like EGF-related receptor;
EN-RAGE, extracellular newly identified receptor for advanced glycation end products binding protein (S100A12);
FGF, fibroblast growth factor;
FGF-19, fibroblast growth factor 19;
FGF-21, fibroblast growth factor 21;
FGF-23, fibroblast growth factor 23;
Flt3L, Fms-like tyrosine kinase 3 ligand;
HGF, hepatocyte growth factor;
IFN-γ, interferon gamma;
IL, interleukin;
LAP TGF-β-1, latency-associated peptide transforming growth factor beta-1;
LIF-R, leukemia inhibitory factor receptor;
MCP, monocyte chemoattractant protein;
MMP, matrix metalloproteinase;
MMP-1, matrix metalloproteinase-1;
MMP-10, matrix metalloproteinase-10;
NT-3, neurotrophin-3;
OPG, osteoprotegerin;
OSM, oncostatin M;
PD-L1, programmed death-ligand 1;
SCF, stem cell factor;
SIRT2, sirtuin 2;
SLAMF1, signaling lymphocytic activation molecule family member 1;
ST1A1, sulfotransferase family 1A member 1;
STAMBP, signal transducing adaptor molecule binding protein;
TGF-α, transforming growth factor alpha;
TNF, tumor necrosis factor;
TNFB, tumor necrosis factor beta;
TNFRSF9, tumor necrosis factor receptor superfamily member 9;
TNFSF14, tumor necrosis factor superfamily member 14;
TRAIL, TNF-related apoptosis-inducing ligand;
TRANCE, TNF-related activation-induced cytokine (RANKL);
TWEAK, TNF-like weak inducer of apoptosis;
uPA, urokinase-type plasminogen activator;
VEGFA, vascular endothelial growth factor A.
